# Supplementary material for: Bioactive Secondary Metabolites from Phomopsis sp., an Endophytic Fungus from Senna spectabilis
Source: PubMed Central journal article supplement (PMC6271730; doi:10.3390/molecules19056597), 2014-05-22

# Supplementary Material for Bioactive Secondary Metabolites from *Phomopsis* sp., an Endophytic Fungus from *Senna spectabilis*

NMR spectra of compound 7.

S1–S3

MS spectrum of compound 7.

S4

Figure S1.  $^1\text{H-NMR}$  spectrum (500MHz,  $\text{DMSO-}d_6$ ) of 7.

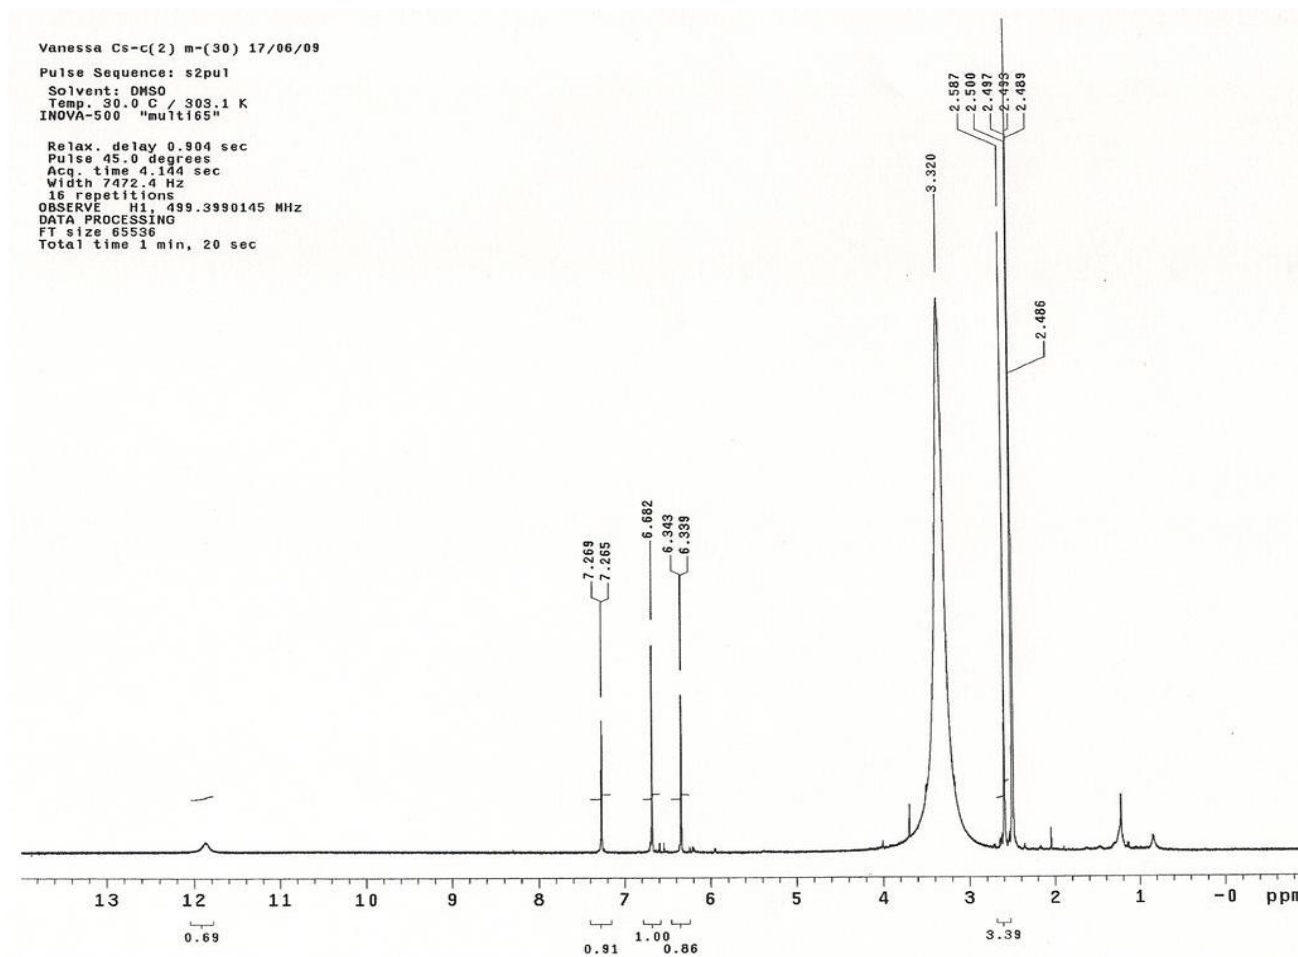

Figure S2. gHMBC spectrum (DMSO- $d_6$ ) of 7.

Relax. delay 1.000 sec  
Acq. time 0.137 sec  
Width 7472.4 Hz  
2D Width 29027.6 Hz  
32 repetitions  
128 increments  
OBSERVE H1, 499.3990145 MHz  
DATA PROCESSING  
Sine bell 0.069 sec  
F1 DATA PROCESSING  
Sine bell 0.003 sec  
FT size 2048 x 2048  
Total time 1 hr, 24 min, 0 sec

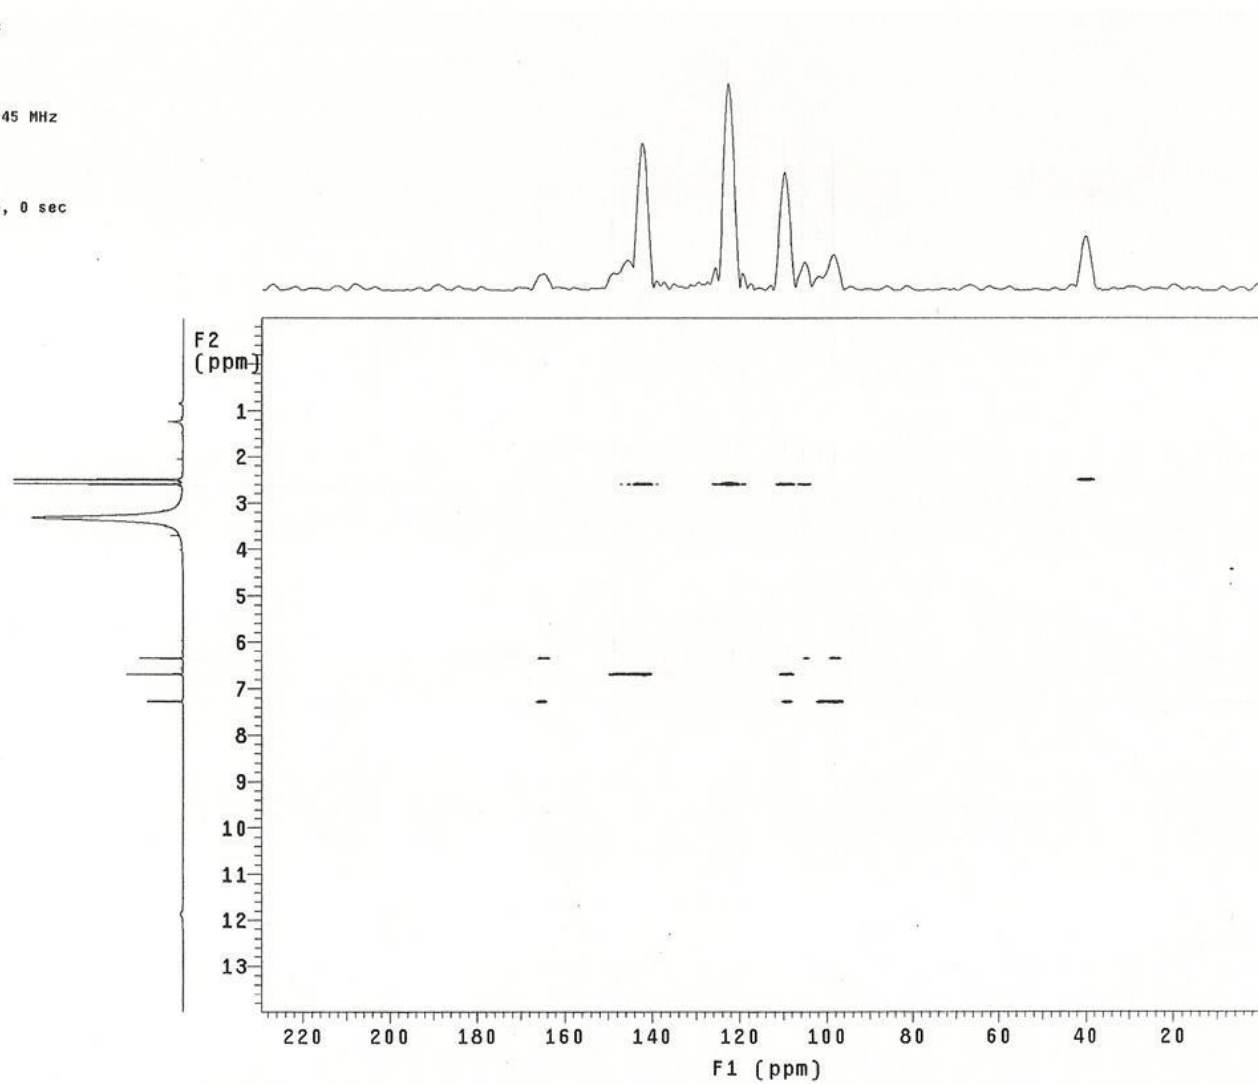

Figure S3. gHMQC spectrum (DMSO- $d_6$ ) of 7.

Relax. delay 1.000 sec  
Acq. time 0.137 sec  
Width 7472.4 Hz  
2D Width 29027.6 Hz  
16 repetitions  
2 x 128 increments  
OBSERVE H1, 499.3990145 MHz  
DECOUPLE C13, 125.5883303 MHz  
Power 47 dB  
on during acquisition  
off during delay  
GARP-1 modulated  
DATA PROCESSING  
Gauss apodization 0.063 sec  
F1 DATA PROCESSING  
Gauss apodization 0.003 sec  
FT size 2048 x 2048  
Total time 1 hr, 21 min, 53 sec

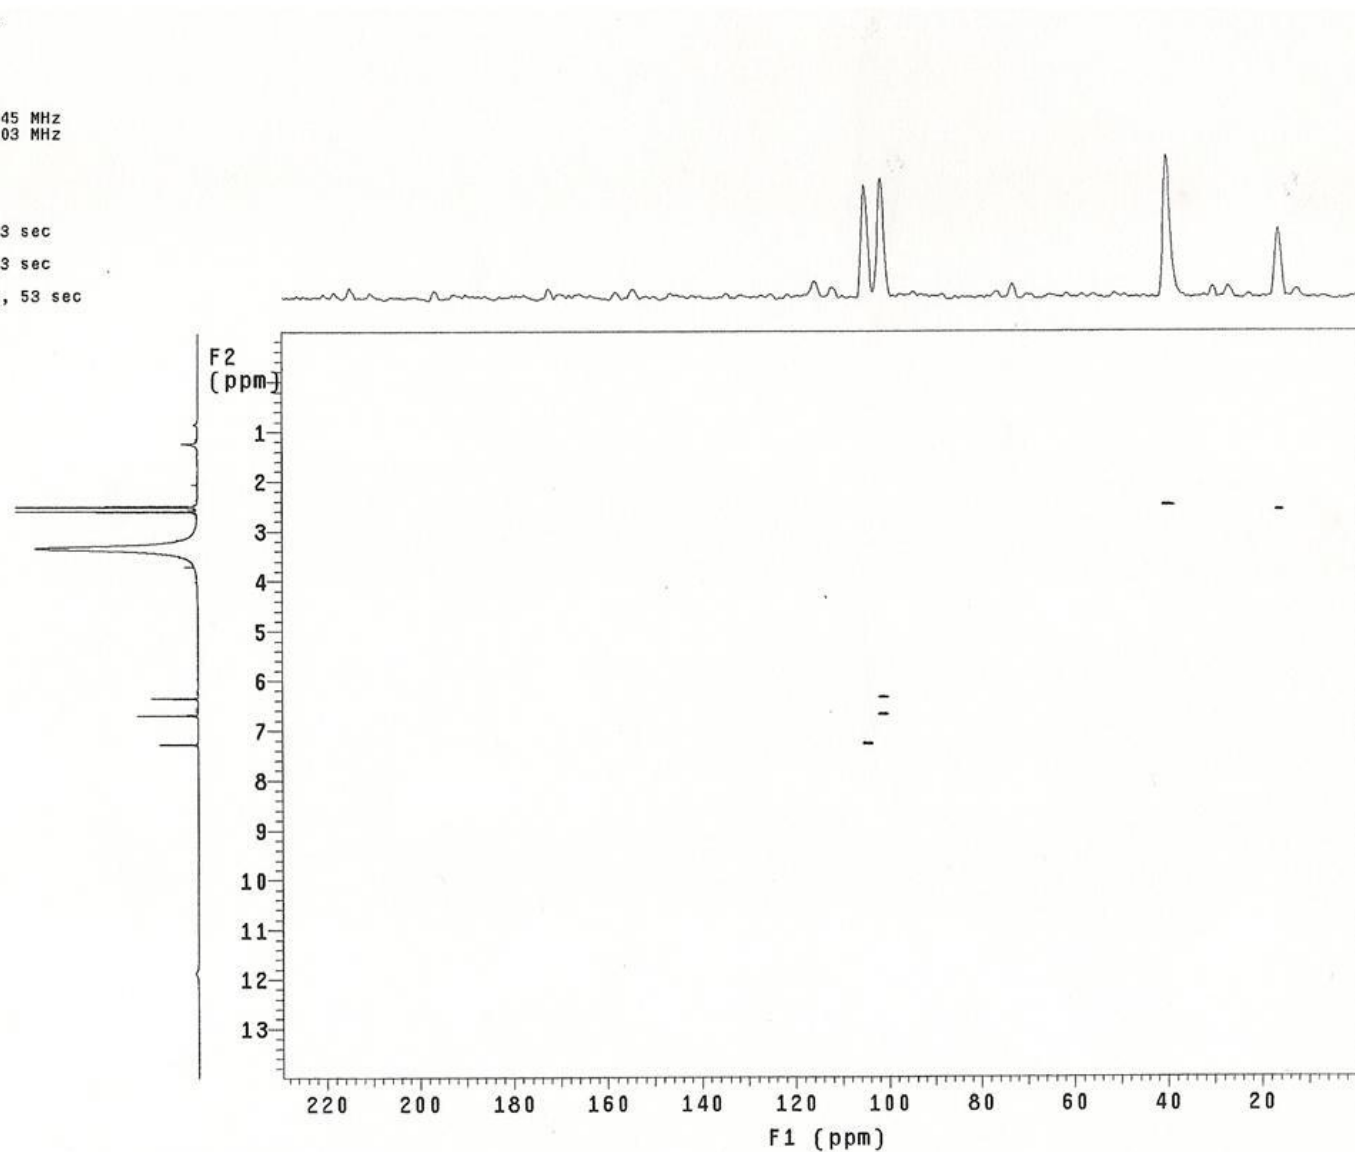

Figure S4. Mass spectrum of 7.

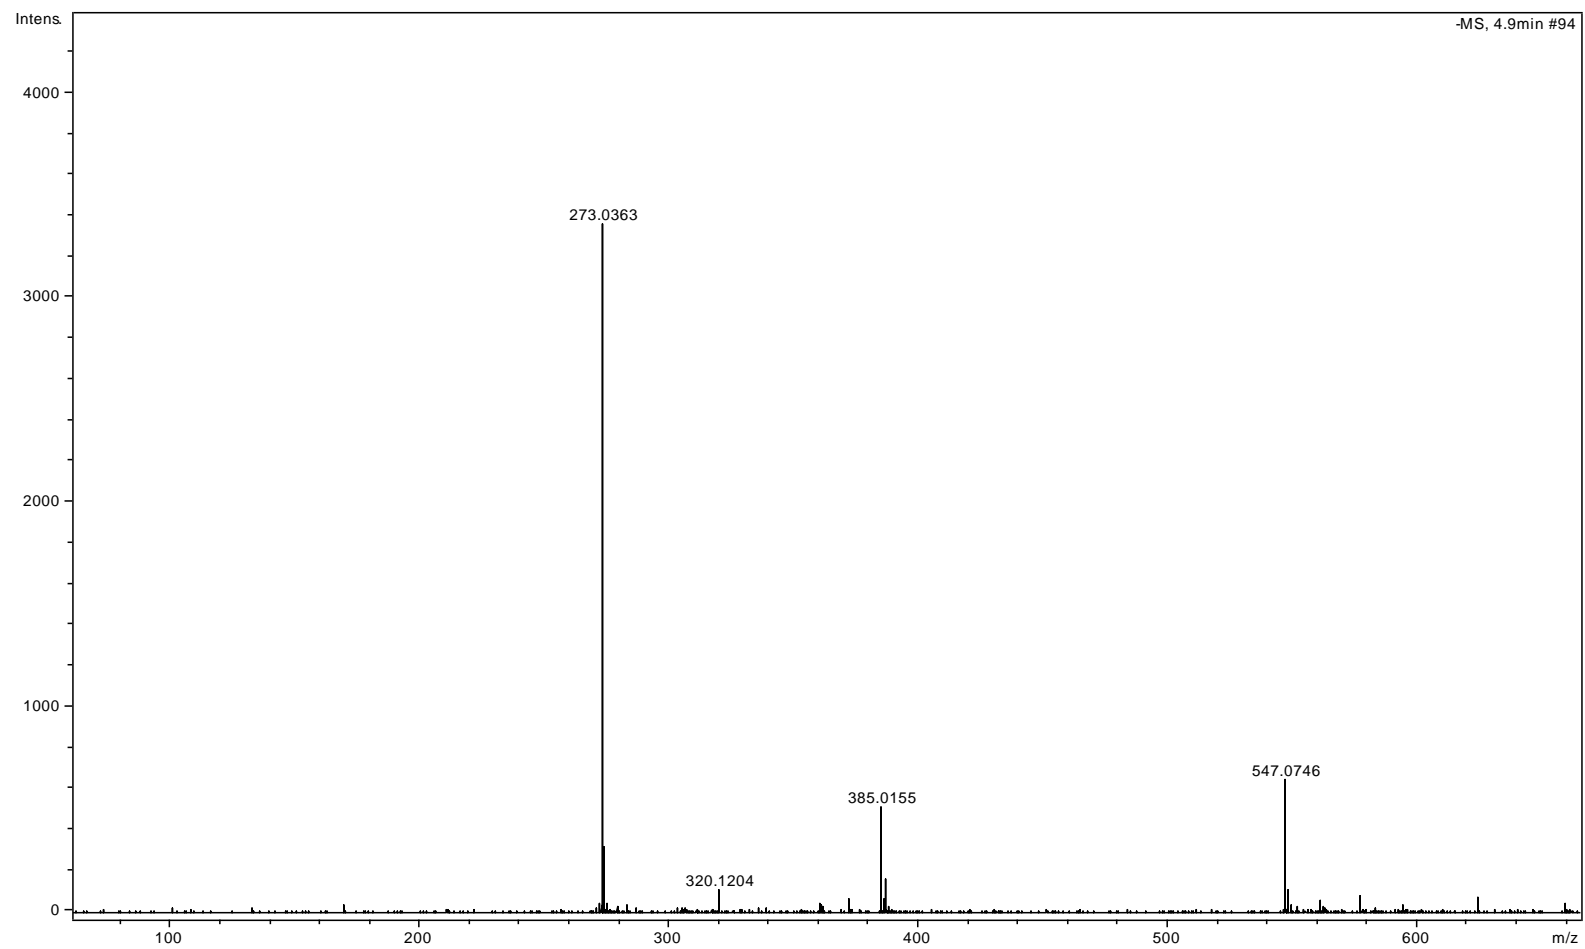

Supplement: molecules-19-06597-s001.pdf [file molecules-19-06597-s001.pdf]
